# Supplementary material for: Prospective longitudinal study of the pregnancy DNA methylome: the US Pregnancy, Race, Environment, Genes (PREG) study
Source: PubMed Central journal article supplement — BMJ Open. 2018 May 9;8(5):e019721. doi: 10.1136/bmjopen-2017-019721 (PMC5942473; doi:10.1136/bmjopen-2017-019721), 2018-05-09
Supplement: bmjopen-2017-019721supp001.pdf [file bmjopen-2017-019721supp001.pdf]

**Table S1. Assessment of Social Determinants of Health and Pregnancy-Specific and Postpartum Environments**

| <b>Assessment</b>                                                        | <b>Description and Reference</b>                                                                                                                                                                                        |
|--------------------------------------------------------------------------|-------------------------------------------------------------------------------------------------------------------------------------------------------------------------------------------------------------------------|
| <b><i>Baseline Study Visit Questionnaire</i></b>                         |                                                                                                                                                                                                                         |
| Demographic                                                              | Study specific, assesses demographic variables (e.g., objective and subjective SES, education, religiosity, type of household dwelling, number of people per room, job, relationship status)                            |
| Neighborhood Inventory for Environmental Typology (NIfETy)               | Objective indicator of incidence and prevalence of environmental indicators related to health (e.g., crime, drugs, quality of built environment, social order/disorder; Furr-Holden et al., 2008)                       |
| Neighborhood Environment Scale                                           | Subjective neighborhood assessment                                                                                                                                                                                      |
| Medical Chart Review                                                     | Medical (past pregnancies, current health conditions, medications) and family medical history                                                                                                                           |
| Trauma History Questionnaire                                             | Assesses exposure to traumatic events (e.g., robbery, sexual assault; Green, 1996)                                                                                                                                      |
| Life Experiences Survey                                                  | Assesses positive and negative life experiences and perceived impact (Sarason et al., 1978)                                                                                                                             |
| NEO-Five-Factor Inventory (NEO-FFI)                                      | Five factor model of personality (McCrae & Costa, 2004)                                                                                                                                                                 |
| Family Adaptability, Partnership, Growth, Affection, and Resolve (APGAR) | This measure assesses family functioning and relationship with family of origin (Smilkestein, 1978)                                                                                                                     |
| Ways of Coping Questionnaire                                             | Assesses individual coping style (e.g., avoidant, active, social) (Folkman & Lazarus, 1998)                                                                                                                             |
| Experiences of Discrimination (EOD)                                      | Measures experiences of discrimination in seven situations (including medical care), responses to unfair treatment, worry about racial discrimination, and global questions about discrimination (Kreiger et al., 2005) |
| Rosenberg Self-Esteem Scale                                              | Assesses orientations towards oneself and evaluation of one's self-worth (Rosenberg, 1965)                                                                                                                              |

|                                                     |                                                                                                                                                                                                                                                    |
|-----------------------------------------------------|----------------------------------------------------------------------------------------------------------------------------------------------------------------------------------------------------------------------------------------------------|
| Pregnancy Risk Assessment Monitoring System (PRAMS) | Attitudes about the pregnancy, content and source of prenatal care, alcohol and tobacco consumption, abuse before and during pregnancy, pregnancy-related morbidity, contraceptive use, knowledge of pregnancy-related health issues (CDC Measure) |
|-----------------------------------------------------|----------------------------------------------------------------------------------------------------------------------------------------------------------------------------------------------------------------------------------------------------|

|                            |                                                                                |
|----------------------------|--------------------------------------------------------------------------------|
| Marital Satisfaction Scale | Measures satisfaction toward her partner and relationship (Roach et al., 1981) |
|----------------------------|--------------------------------------------------------------------------------|

|                           |                                                                             |
|---------------------------|-----------------------------------------------------------------------------|
| Pregnancy-Related Anxiety | Assesses feelings and worries about current pregnancy (Huizink et al. 2004) |
|---------------------------|-----------------------------------------------------------------------------|

### ***PREG Follow Up Visit***

---

|                                 |                                                                                     |
|---------------------------------|-------------------------------------------------------------------------------------|
| Prenatal Distress Questionnaire | Assesses specific worries and concerns pertaining to pregnancy (Yali & Lobel, 1999) |
|---------------------------------|-------------------------------------------------------------------------------------|

|                        |                                                                                               |
|------------------------|-----------------------------------------------------------------------------------------------|
| Perceived Stress Scale | Current non-pregnancy related life stressors and perception of stressors (Cohen et al., 1983) |
|------------------------|-----------------------------------------------------------------------------------------------|

|                     |                                                                                                |
|---------------------|------------------------------------------------------------------------------------------------|
| Daily Hassles Scale | Current parenting-related life stressors and perception of stressors (Crnic & Greenberg, 1990) |
|---------------------|------------------------------------------------------------------------------------------------|

|                                                                          |                                                                                                                                   |
|--------------------------------------------------------------------------|-----------------------------------------------------------------------------------------------------------------------------------|
| Job Demands and Decision Latitude (JDDL) and job stress during pregnancy | Assesses job strain (emotional and physical) and perceived job-related stress (Karasak, 1979 (from Oths et al., 2001) Oths, 2001) |
|--------------------------------------------------------------------------|-----------------------------------------------------------------------------------------------------------------------------------|

|                                   |                                                                                            |
|-----------------------------------|--------------------------------------------------------------------------------------------|
| Perceptions of Racism Scale (PRS) | Assess perceptions and experiences of racism in health care during pregnancy (Green, 1995) |
|-----------------------------------|--------------------------------------------------------------------------------------------|

|                           |                                                                                                  |
|---------------------------|--------------------------------------------------------------------------------------------------|
| MOS Social Support Survey | Emotional, tangible, affectionate, and positive social interactions (Sherbourne & Stewart, 1993) |
|---------------------------|--------------------------------------------------------------------------------------------------|

|                                       |                                                                                                      |
|---------------------------------------|------------------------------------------------------------------------------------------------------|
| Prenatal Social Environment Inventory | Social influences on the pregnancy, especially relationship with current children (Orr et al., 1992) |
|---------------------------------------|------------------------------------------------------------------------------------------------------|

|                                                         |                                                                                      |
|---------------------------------------------------------|--------------------------------------------------------------------------------------|
| Composite International Diagnostic Interview Short Form | Includes items about phobias, substance use, and lifetime history of psychopathology |
|---------------------------------------------------------|--------------------------------------------------------------------------------------|

|                                      |               |
|--------------------------------------|---------------|
| Fagerstrom Scale and Smoking History | Cigarette Use |
|--------------------------------------|---------------|

Alcohol Audit                      Current alcohol use

Eating Assessment Table      Assesses food groups and cooking methods

Lifestyle Profile                      Way of life/personal habits. Includes items about exercise, outlook, spirituality, and coping efforts.

Household Food  
Insecurities and Access  
Scale                      Food Availability (USAID measure)

Symptom Checklist-27                      Assesses the degree that a symptom has distressed/bothered someone

***Postpartum (MDP) Visits\****

Edinburgh Postnatal  
Depression Scale  
(EPDS)                      Measure of depressive symptoms and suicidality (Cox et al., 1987)

Karitane Parenting  
Confidence Scale  
(KPCS)                      Assesses parenting self-efficacy (Crncec et al., 2008) (Kohlhoff et al., 2013)

MOS Social Support  
Survey (MOS)                      Emotional, tangible, affectionate, and positive social interactions (Sherbourne & Stewart, 1993)

Maternal-fetal/child  
Attachment Scale  
(MFAS)                      Assesses extent of maternal affiliation and interaction with their unborn child (during pregnancy) and their infant (during postpartum) (Cranley, 1981) (McFarland et al. 2011)

\* MDP visits included these four scales in addition to the PREG follow up questionnaire
